# Supplementary material for: An Engineered Cytidine Deaminase for Biocatalytic Production of a Key Intermediate of the Covid-19 Antiviral Molnupiravir
Source: PubMed Central journal article supplement — J Am Chem Soc. 2022 Feb 28;144(9):3761–5. doi: 10.1021/jacs.1c11048 (PMC8915250; doi:10.1021/jacs.1c11048), 2022-02-28
Supplement: ja1c11048_si_001.pdf [file ja1c11048_si_001.pdf]

# An Engineered Cytidine Deaminase for Biocatalytic Production of a Key Intermediate of the Covid-19 Antiviral Molnupiravir

Ashleigh J. Burke<sup>[a]</sup>, William R. Birmingham<sup>[a, †]</sup>, Ying Zhuo<sup>[a, †]</sup>, Thomas W. Thorpe<sup>[a, †]</sup>, Bruna Zucoloto da Costa<sup>[a]</sup>, Rebecca Crawshaw<sup>[a]</sup>, Ian Rowles<sup>[a]</sup>, James D. Finnigan<sup>[b]</sup>, Carl Young<sup>[b]</sup>, Gregory M. Holgate<sup>[c]</sup>, Mark P. Muldowney<sup>[c]</sup>, Simon J. Charnock<sup>[b]</sup>, Sarah L. Lovelock<sup>[a]\*</sup>, Nicholas J. Turner<sup>[a]\*</sup> and Anthony P. Green<sup>[a]\*</sup>

[a] Department of Chemistry, University of Manchester, Manchester Institute of Biotechnology, 131 Princess Street, Manchester, M1 7DN, UK

[b] Prozomix Ltd, Building 4, West End Ind. Estate, Haltwhistle, NE49 9HA, UK

[c] Sterling Pharma Solutions, Sterling Place, Dudley, Northumberland, NE23 7QG, UK

[†] These authors contributed equally

## Methods

### Materials.

All chemicals and biological materials were obtained from commercial suppliers. *N*-Hydroxy-cytidine from Cambridge Bioscience; cytidine, uridine, Lysozyme, DNase I and kanamycin were purchased from Sigma Aldrich; polymyxin B sulfate from AlfaAesar; LB agar, LB media, 2×YT media and arabinose from Formedium; *Escherichia coli* BL21 (DE3), Q5 DNA polymerase, T4 DNA ligase and restriction enzymes from New England BioLabs; and oligonucleotides were synthesized by Integrated DNA Technologies.

### Construction of pET29b(+)\_CD.

The *E. coli*-optimized gene (synthesized by Integrated DNA Technologies) for cytidine deaminase (CD) from *E. coli* was cloned into pET29b(+) using *Nde*I and *Xho*I restriction sites to yield pET29b(+)\_CD.

### Protein production and purification.

For expression of CD and variants, chemically competent *E. coli* BL21 (DE3) were transformed with the relevant pET29b(+)\_CD constructs. Single colonies of freshly transformed cells were cultured for 18 h in 5 mL LB medium containing 50 µg mL<sup>-1</sup> kanamycin. Starter cultures (500 µL) were used to inoculate 50 mL 2×YT medium supplemented with 50 µg mL<sup>-1</sup> kanamycin. Cultures were grown at 37 °C, 200 r.p.m. to an optical density at 600 nm (OD<sub>600</sub>) of around 0.5. Protein expression was induced with the addition of IPTG to a final concentration of 0.1 mM. Induced cultures were incubated for 20 h at 30 °C and the cells were subsequently collected by centrifugation (3,220 × *g* for 10 min). Pelleted cells were resuspended in lysis buffer (50 mM HEPES, 300 mM NaCl, pH 7.5 containing 20 mM imidazole) and lysed by sonication. Cell lysates were cleared by centrifugation (27,216 × *g* for 30 min) and supernatants were subjected to affinity chromatography using Ni-NTA Agarose (Qiagen). Purified protein was eluted using 50 mM HEPES, 300 mM NaCl, pH 7.5 containing 250 mM imidazole. Proteins were desalted using 10DG desalting columns (Bio-Rad) with PBS pH 7.4 and analyzed by SDS PAGE. Proteins were aliquoted, flash-frozen in liquid nitrogen and stored at -80 °C. Protein concentrations were determined by measuring the absorbance at 280 nm and assuming an extinction coefficient of 29910 M<sup>-1</sup> cm<sup>-1</sup>.

### Mass spectrometry.

Purified protein samples were buffer-exchanged into 0.1% acetic acid using a 10k MWCO Vivaspin (Sartorius) and diluted to a final concentration of 0.5 mg ml<sup>-1</sup>. To determine whether the protein is modified in the presence of NH<sub>2</sub>OH, CD and its variants (2.5 µM) were incubated in 10% NH<sub>2</sub>OH (~3M, pH 7) for 20 minutes prior to buffer exchanging. Mass spectrometry was performed using a 1200 series Agilent LC, 5 µL injection into 5% acetonitrile (with 0.1% formic acid) and desalted inline for 1 min. Protein was eluted over 1 min using 95% acetonitrile with 5% water. The resulting multiply charged spectrum was analysed using an Agilent QTOF 6510 and deconvoluted using Agilent MassHunter Software.

### Library construction.

Saturation mutagenesis. Positions were individually randomized using NNK codon degeneracy. DNA libraries were constructed by overlap extension PCR. The linear library fragments and the pET29b(+) vector were digested using *NdeI* and *XhoI* endonucleases, gel-purified and subsequently ligated using T4 DNA ligase.

Recombination of beneficial mutations by overlap extension PCR.

After each round of evolution, beneficial diversity was combined by rational recombination of fragments generated by overlap extension PCR. Primers were designed that encoded either the parent amino acid or the identified mutation. These primers were used to generate short fragments which were gel-purified and mixed appropriately in overlap extension PCR to generate genes containing all possible combinations of mutations. Genes were cloned as described above.

Library screening.

For protein expression and screening, all transfer and aliquotting steps were performed using Hamilton liquid-handling robots. Chemically competent *E. coli* BL21 (DE3) cells were transformed with the ligated libraries. Freshly transformed clones were used to inoculate 150  $\mu\text{L}$  of LB medium supplemented with 50  $\mu\text{g mL}^{-1}$  kanamycin in Corning® Costar® 96-well microtitre round bottom plates. For reference, each plate contained 6 freshly transformed clones of the parent template and 2 clones containing an empty pET29b(+) vector. Plates were incubated overnight at 30 °C, 80 % humidity in a shaking incubator at 850 r.p.m. 20  $\mu\text{L}$  of overnight culture was used to inoculate 480  $\mu\text{L}$  2xYT medium supplemented with 50  $\mu\text{g mL}^{-1}$  kanamycin. The cultures were incubated at 30 °C, 80 % humidity with shaking at 850 r.p.m. until an OD600 of about 0.5 was reached, and IPTG was added to a final concentration of 0.1 mM. Induced plates were incubated for 20 h at 30 °C, 80 % humidity with shaking at 850 r.p.m. Cells were harvested by centrifugation at 2,900  $\times g$  for 10 min. The supernatant was discarded, the pelleted cells were resuspended in 400  $\mu\text{L}$  lysis buffer (PBS pH 7.4 buffer supplemented with 1.0 mg  $\text{mL}^{-1}$  lysozyme, 0.5 mg  $\text{mL}^{-1}$  polymixin B and 10  $\mu\text{g mL}^{-1}$  DNase I) and incubated for 2 h at 30 °C, 80 % humidity with shaking at 850 r.p.m. Cell debris was removed by centrifugation at 2,900  $\times g$  for 10 min. 10  $\mu\text{L}$  clarified lysate was transferred to 96-well microtitre plates containing 170  $\mu\text{L}$  1% (~300 mM)  $\text{NH}_4\text{OH}$  pH 7. Reactions were initiated with the addition of 20  $\mu\text{L}$  cytidine (50 mM final concentration) in PBS pH 7.4. The reaction was monitored spectrophotometrically at 340 nm, over 30 minutes using a CLARIOstar plate reader (BMG Labtech). Reaction rates of individual variants were normalized to the average of the 6 parent clones. Following each round, the most active variants were rescreened as purified proteins using the HPLC assay. Proteins were produced and purified as described above, however starter cultures were inoculated from glycerol stocks prepared from the original overnight cultures.

General procedure for analytical scale biotransformation.

To compare the activity of CD and its variants, analytical scale biotransformations were performed using 2 (750 mM) and the relevant biocatalyst (25  $\mu\text{M}$ ) in hydroxylamine (10 % in water, pH 7). For HPLC analysis, reactions were quenched with the addition of 2 volumes of acidified acetonitrile. Samples were vortexed and precipitated proteins were removed by centrifugation (14,000  $\times g$  for 5 minutes).

Preparative scale biotransformations.

Cytidine (5 g, 750 mM, 180 g  $\text{L}^{-1}$ ) was dissolved in hydroxylamine (26.6 mL, 10 % in water, pH 7) in a 50 mL falcon tube and cooled to 4 °C. CD1.3 purified enzyme (0.2 mL, 7.5  $\mu\text{M}$ , 0.25 g  $\text{L}^{-1}$  final concentration) was added to the reaction mixture. The reaction was left on a tabletop roller for 3 hours at 4 °C during which time the *N*-hydroxy-cytidine product crystallized in situ. The reaction mixture was centrifuged at 2900  $\times g$  for 5 minutes and the supernatant removed. The remaining solid was washed with cold acidified water (10 mL, 10% AcOH) and then freeze dried overnight to give the monohydrated product as a free flowing white powder (4.85 g, 85% yield, >98% purity). A Karl Fischer titration was used to confirm the product crystallizes as a monohydrate (6.7 wt%  $\text{H}_2\text{O}$ ) as described previously in the literature (reference 7 in the manuscript).  $^1\text{H}$  NMR (400 MHz,  $\text{D}_2\text{O}$ )  $\delta$  7.01 (d,  $J$  = 8.2 Hz, 1H), 5.77 (d,  $J$  = 5.7 Hz, 1H), 5.67 (d,  $J$  = 8.2 Hz, 1H), 4.21 (t,  $J$  = 5.6 Hz, 1H), 4.10 (t,  $J$  = 5.0 Hz, 1H), 4.01 – 3.93 (m, 1H), 3.75 (dd,  $J$  = 12.7, 3.2 Hz, 1H), 3.66 (dd,  $J$  = 12.6, 4.6 Hz, 1H).  $^{13}\text{C}$  NMR (101 MHz,  $\text{D}_2\text{O}$ )  $\delta$  150.91, 146.84, 131.69, 98.43, 88.00, 84.00, 72.54, 69.76, 61.05. MS: 260 (M+H) $^+$ .

Cytidine (37.6 g, 770 mM, 188 g  $\text{L}^{-1}$ ) was dissolved in hydroxylamine (200 mL, 10 % in water, pH 7) in a 500 mL flask and cooled to 4 °C. CD1.3 cell free extract (376 mg, 1 % wt) was added to the reaction mixture. The reaction was left on a tabletop shaker for 3 hours at 4 °C during which time the *N*-hydroxy-cytidine product crystallized in situ. The reaction mixture was centrifuged at 2900  $\times g$  for 10 minutes and the supernatant removed. The remaining solid was washed with cold acidified water (30 mL, 10% AcOH) and then freeze dried overnight to give the monohydrated product as a white powder (40.8 g, 89 % yield, >96 % purity).  $^1\text{H}$  NMR (400 MHz,  $\text{D}_2\text{O}$ )  $\delta$  7.00 (d,  $J$  = 8.3 Hz, 1H), 5.79 (d,  $J$  = 5.6 Hz, 1H), 5.68 (d,  $J$  = 8.2 Hz, 1H), 4.23 (t,  $J$  = 5.7 Hz, 1H), 4.12 (t,  $J$  = 5.0 Hz, 1H), 3.99 (q,  $J$  = 4.2 Hz, 1H), 3.81 – 3.61 (m, 2H).  $^{13}\text{C}$  NMR (101 MHz,  $\text{D}_2\text{O}$ )  $\delta$  151.27, 146.63, 131.34, 98.69, 87.95, 84.00, 72.50, 69.79, 61.07. MS: 260 (M+H) $^+$ .

Cytidine (169.2 g, 0.69 mol, 1 eq) was dissolved in 10% hydroxylamine (900 mL, 2.92 mol, 4.2 eq, pH 7) in a 2L Mettler Toledo AP01 jacketed vessel and cooled to 4°C. CD1.3 crude lysate (730 mg, 0.45 % wt) was suspended in pH 7 phosphate buffer and brought to a volume of 6.75 mL, this solution was added to the reaction mix. The reaction was stirred at 300 rpm for 3 hours at 4 °C during which time the *N*-hydroxy-cytidine 4 product crystallized in situ. The reaction mixture was filtered through 20  $\mu\text{m}$  cloth, and the remaining solid was washed with 10% AcOH in water (340 mL, 2 vol). The solid was then dried in a vacuum oven at 30°C for 18 hours giving a white solid (136.8 g, 71% yield, >95% purity by NMR & HPLC).  $^1\text{H}$  NMR (400 MHz,  $\text{D}_2\text{O}$ )  $\delta$  7.1 (d, 1H), 5.8 (d, 1H), 5.6 (d, 1H), 4.1 (t, 1H), 4.1 (t, 1H), 3.9 (q, 1H), 3.7 (dd, 1H), 3.6 (dd, 1H).

Chromatographic analysis.

HPLC and LCMS analysis was performed on a 1200 Series Agilent LC or LC/MSD system with an InfinityLab Poroshell 120 EC-C18, 4.6 mm x 100 mm, 4 $\mu$ m LC Column (Agilent). Substrates and products were eluted over 14 minutes using a gradient of 2-20% acetonitrile in 20 mM NH<sub>4</sub>OAc pH 4.5 at 0.3 mL min<sup>-1</sup>. Peaks were assigned by comparison to chemically synthesized standards or analysis of MS data and the peak areas were integrated using Agilent OpenLab software. 2'-deoxycytidine and resulting products were eluted over 64 minutes using a gradient of 1.6-3% acetonitrile.

Supplementary Figures

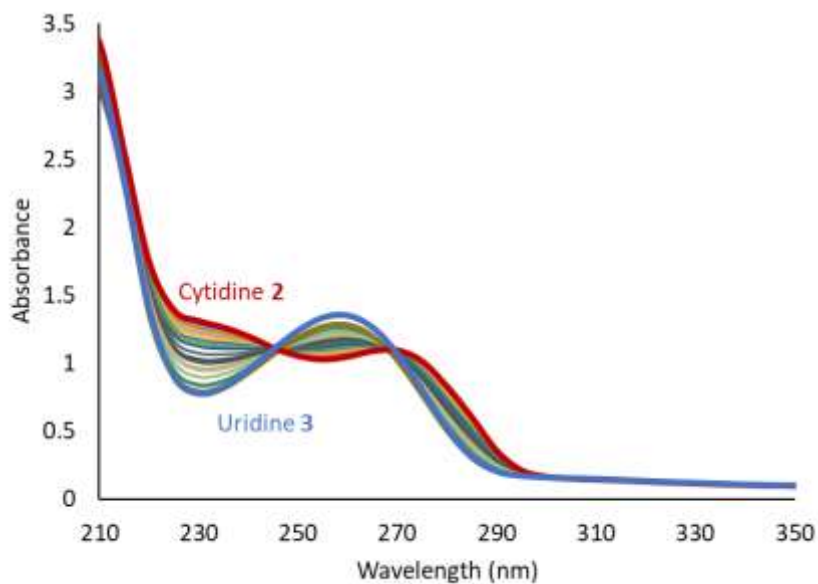

Figure S1: UV-Vis spectra showing the hydrolysis of cytidine 2 (100  $\mu$ M) to uridine 3 catalyzed by CD (10 nM). Spectra of authentic standards of 2 and 3 are shown in red and blue, respectively.

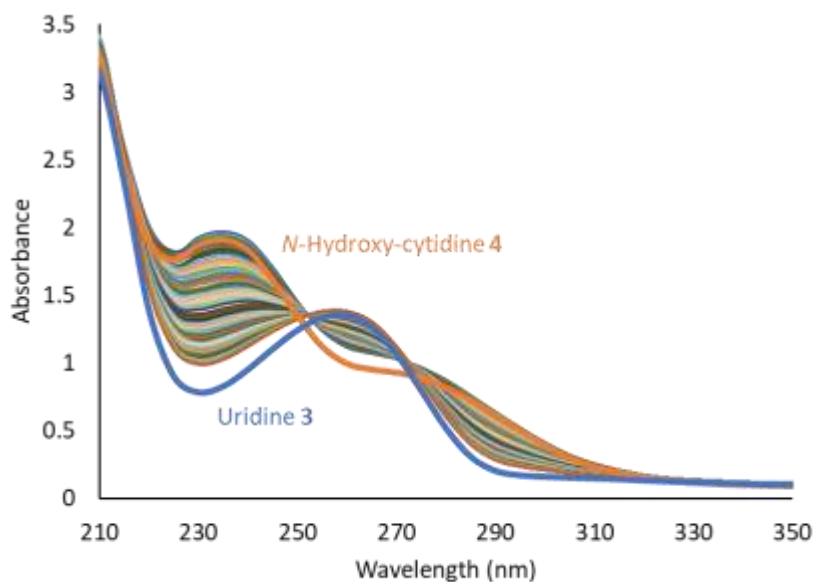

Figure S2: UV-Vis spectra showing the hydrolysis of *N*-hydroxy-cytidine 4 (100  $\mu$ M) to uridine 3 catalyzed by CD (100 nM). Spectra of authentic standards of 4 and 3 are shown in orange and blue, respectively.

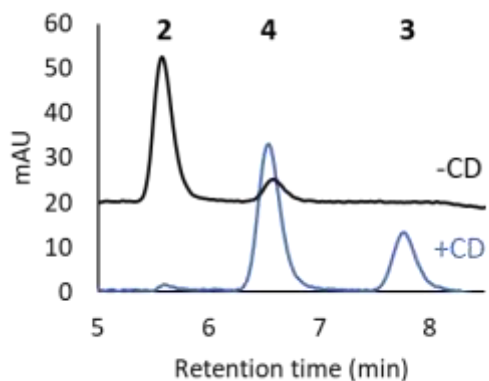

Figure S3: HPLC traces showing cytidine 2 (200 mM) conversion to *N*-hydroxy-cytidine 4 and uridine 3 by CD (20  $\mu$ M) in the presence of 50%  $\text{NH}_2\text{OH}$  pH 7 (blue). Control reactions in the absence of CD show minimal conversion (black). Retention times of 2, 3 and 4 are identical to authentic standards.

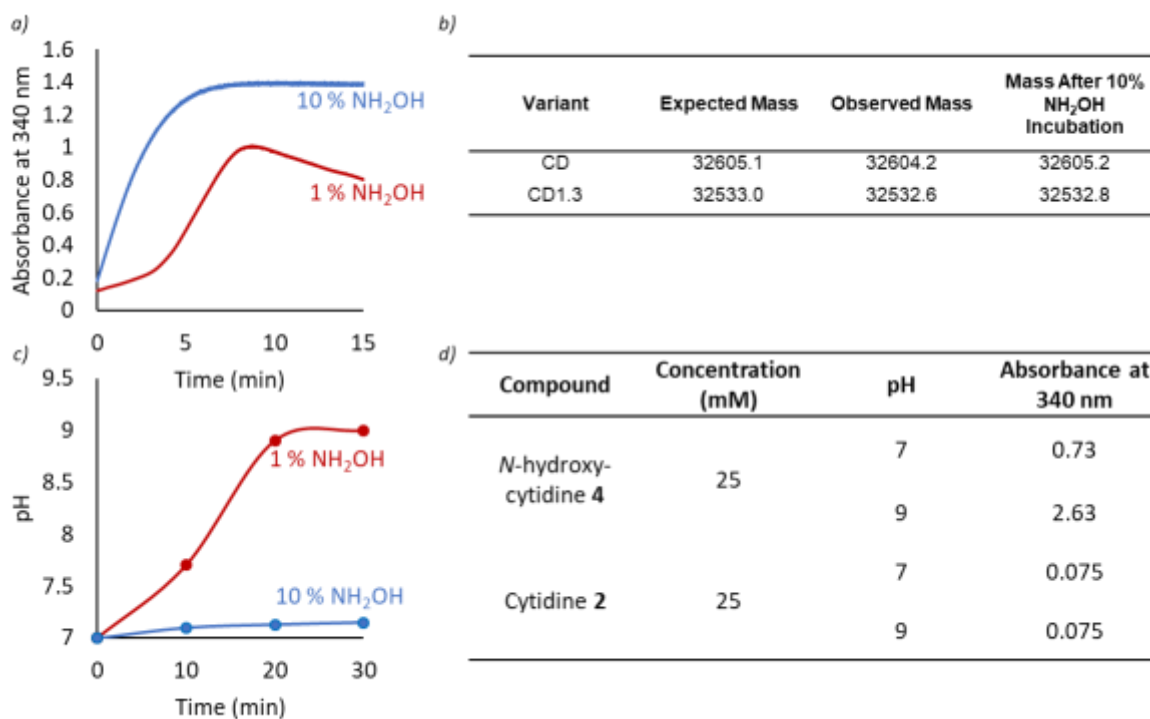

Figure S4: a) The conversion of cytidine 2 (50 mM) to *N*-hydroxy-cytidine 4 catalyzed by CD1.3 (2.5  $\mu$ M) in 1%  $\text{NH}_2\text{OH}$  (~300 mM, pH 7, red) and 10%  $\text{NH}_2\text{OH}$  (~3 M, pH 7, blue), monitored by increasing absorbance at 340 nm. An apparent initial lag phase is observed at low (1%)  $\text{NH}_2\text{OH}$  concentrations. b) Expected and observed masses of CD and CD1.3. The data shows there is no observed change to the mass of the protein following incubation in 10%  $\text{NH}_2\text{OH}$ . This suggests the apparent lag phase in S4a is not caused by enzyme modification during the reaction. c) Observed pH changes under reaction conditions of 1% and 10%  $\text{NH}_2\text{OH}$ . A pH change from 7 to 9 is observed at 1%  $\text{NH}_2\text{OH}$  which is not seen at 10%  $\text{NH}_2\text{OH}$ . d) The extinction coefficient of *N*-hydroxy-cytidine 4 is sensitive to pH changes, this is not observed for cytidine 2.

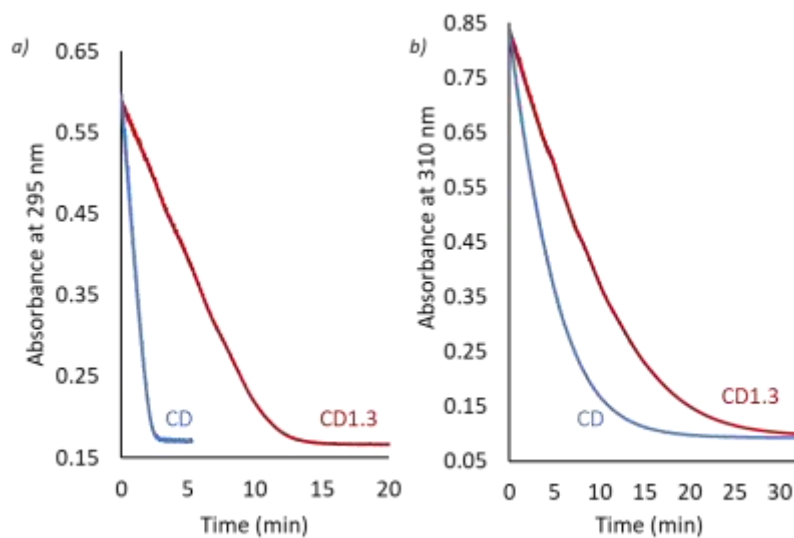

Figure S5: a) The conversion of cytidine 2 (1 mM) to uridine 3 catalyzed by CD1.3 (50 nM, red) and CD (50 nM, blue) in PBS (pH 7.4) monitored by decreasing absorbance at 295 nm.  $k_{obs} = 30 \text{ s}^{-1}$  and  $140 \text{ s}^{-1}$  for CD1.3 and CD, respectively. b) The conversion of *N*-hydroxycytidine 4 (1 mM) to uridine 3 catalyzed by CD1.3 (500 nM, red) and CD (500 nM, blue) in PBS (pH 7.4) monitored by decreasing absorbance at 310 nm.  $k_{obs} = 2 \text{ s}^{-1}$  and  $5 \text{ s}^{-1}$  for CD1.3 and CD, respectively. Reduced rates of hydrolysis contribute to improved performance of CD1.3 for the production of *N*-hydroxycytidine 4.

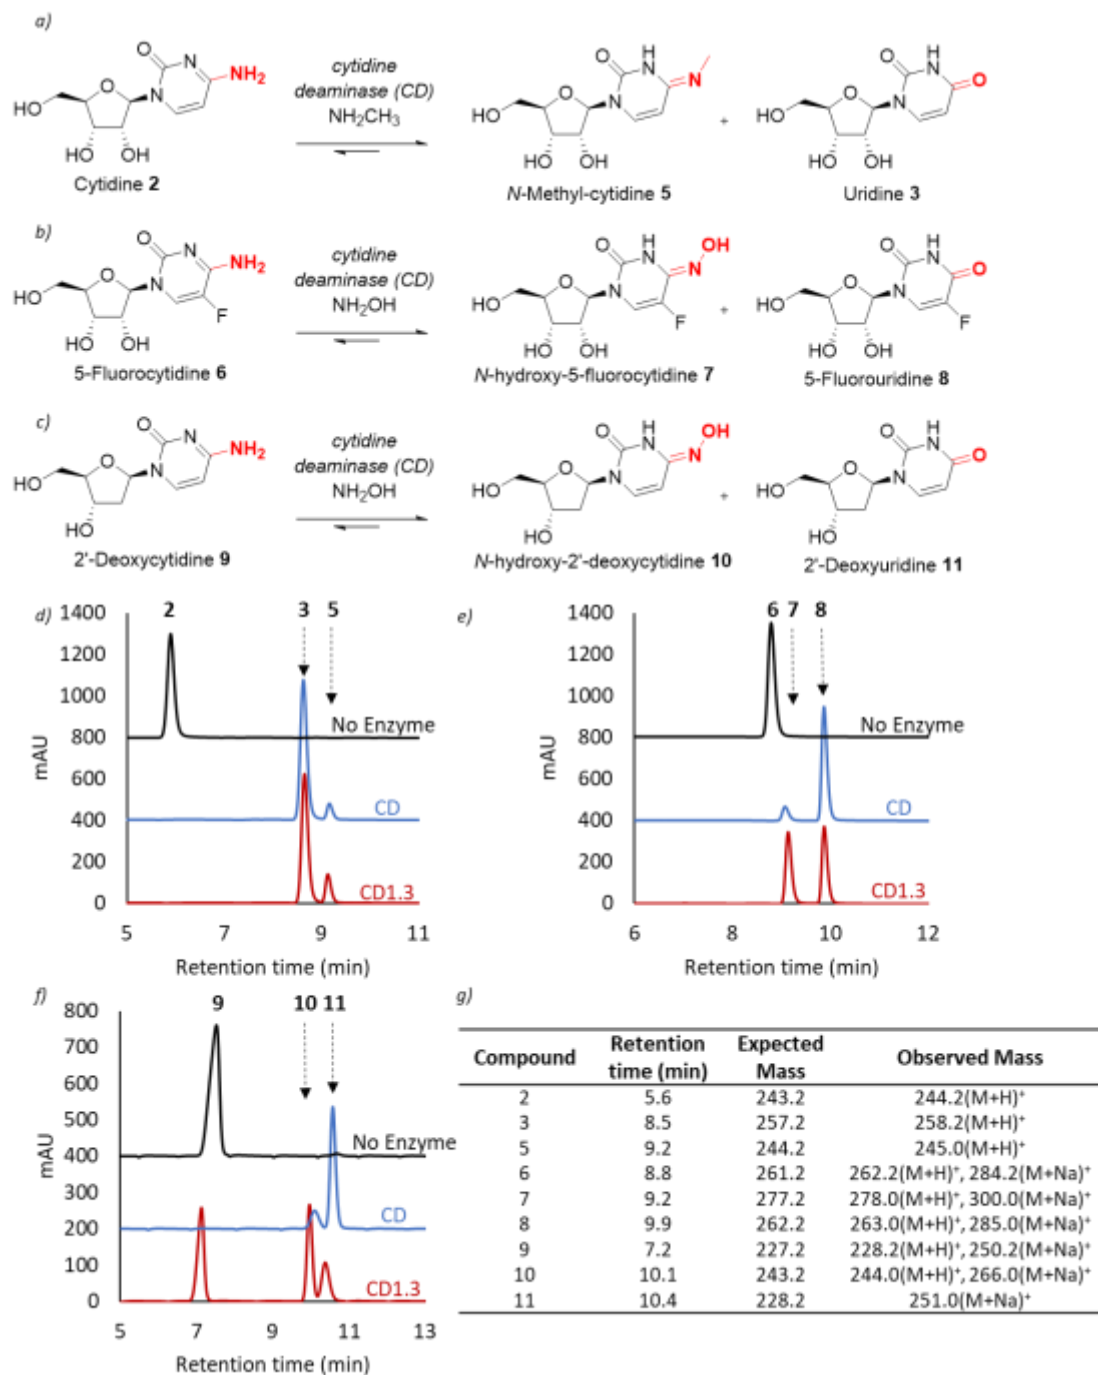

Figure S6: a) Reaction scheme showing the conversion of cytidine 2 to *N*-methylcytidine 5 and uridine 3 catalyzed by cytidine deaminase in the presence of methylamine ( $\text{NH}_2\text{CH}_3$ ). b) Reaction scheme showing the conversion of 5-fluorocytidine 6 to *N*-hydroxy-5-fluorocytidine 7 and 5-fluorouridine 8 catalyzed by cytidine deaminase in the presence of  $\text{NH}_2\text{OH}$ . c) Reaction scheme showing the conversion of 2'-deoxycytidine 9 to *N*-hydroxy-2'-deoxycytidine 10 and 2'-deoxyuridine 11 catalyzed by cytidine deaminase in the presence of  $\text{NH}_2\text{OH}$ . d) HPLC traces showing the conversion of cytidine 2 (50 mM) to *N*-methylcytidine 5 and uridine 3 catalyzed by CD1.3 (1  $\mu\text{M}$ , red), CD (1  $\mu\text{M}$ , blue) and no enzyme (black) in the presence of  $\text{NH}_2\text{CH}_3$  (50% w/v) after 5 minutes. CD1.3 shows improved activity for the production of 5 compared to CD. e) HPLC traces showing the conversion of 5-fluorocytidine 6 (50 mM) to *N*-hydroxy-5-fluorocytidine 7 and 5-fluorouridine 8 catalyzed by CD1.3 (1  $\mu\text{M}$ , red), CD (1  $\mu\text{M}$ , blue) and no enzyme (black) in the presence of 10%  $\text{NH}_2\text{OH}$  (~3 M, pH 7) after 5 minutes. CD1.3 shows improved activity for the production of 7 compared to CD. f) HPLC traces showing the conversion of 2'-deoxycytidine 9 (50 mM) to *N*-hydroxy-2'-deoxycytidine 10 and 2'-deoxyuridine 11 catalyzed by CD1.3 (1  $\mu\text{M}$ , red), CD (1  $\mu\text{M}$ , blue) and

no enzyme (black) in the presence of 10% NH<sub>2</sub>OH (~3 M, pH 7) after 30 minutes. CD1.3 shows improved activity for the production of 10 compared to CD. g) Compound identities were confirmed by LCMS. Expected and observed masses of compounds are shown in a table.

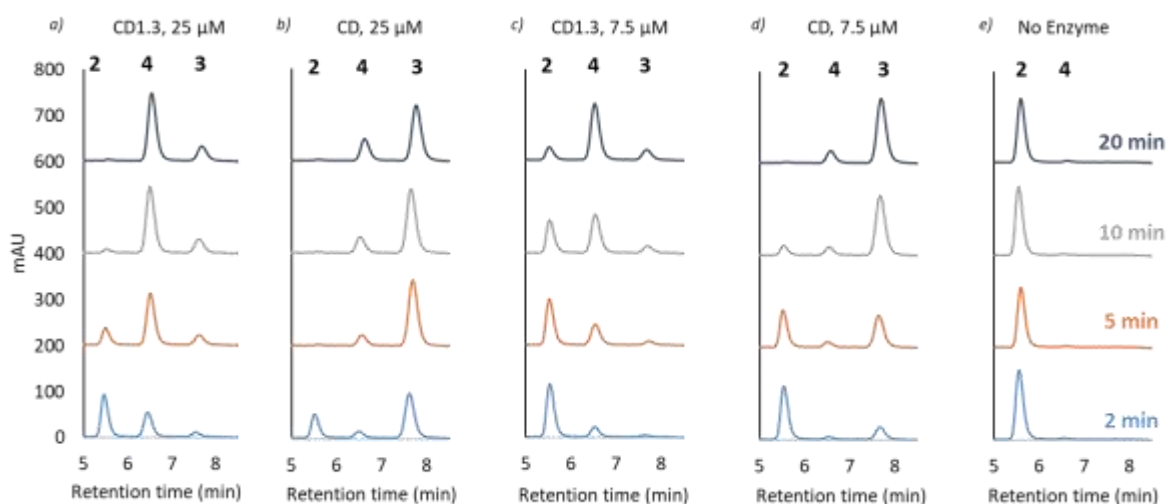

Figure S7: HPLC traces showing cytidine 2 (750 mM) conversion to *N*-hydroxy-cytidine 4 and uridine 3 at 2, 5, 10 and 20 minute time points catalyzed by a) CD1.3 (25 μM), b) CD (25 μM), c) CD1.3 (7.5 μM), d) CD (7.5 μM), e) no enzyme, in the presence of 10% (~3 M) NH<sub>2</sub>OH pH 7. CD1.3 operates predominantly via pathway A (direct conversion of 2 to 4) whereas CD operates via pathway B (hydrolysis of 2 to 3 then equilibrium distribution of 4 and 3). Retention times of 2, 3 and 4 are identical to authentic standards.

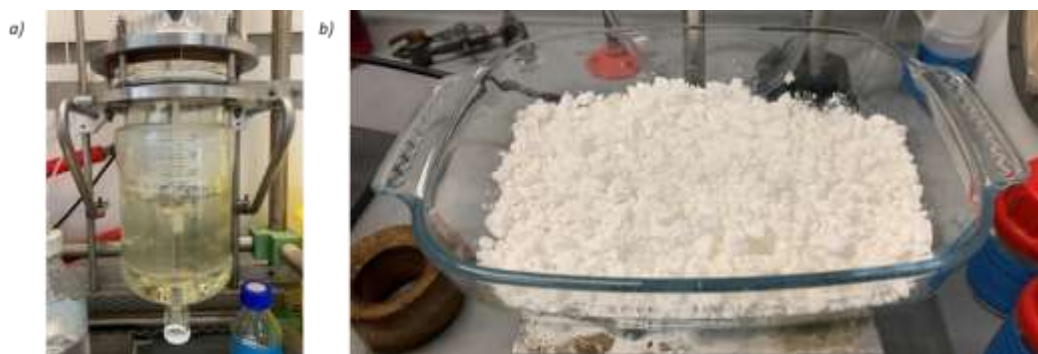

Figure S8: a) A 1 L scale biotransformation was carried out in a 2L Mettler Toledo AP01 jacketed vessel cooled to 4°C. b) *N*-Hydroxy-cytidine 4 crystallized in situ to give 137 g of a white solid in 71% isolated yield and >95% purity following filtration, washing and drying.

Supplementary Table 1: Directed evolution workflow.

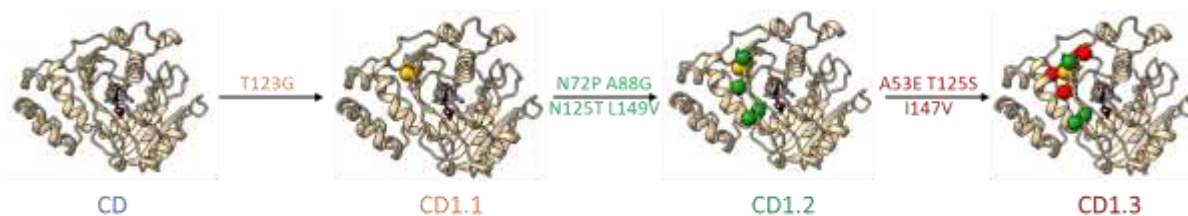

| Round | Description                                                           | Number of clones screened | Beneficial mutations                                             | Best variant                             |
|-------|-----------------------------------------------------------------------|---------------------------|------------------------------------------------------------------|------------------------------------------|
| 1a    | Saturation mutagenesis at 42 positions                                | 3,700                     | A88W, T123G, N125S, N125G                                        | CD1.1 = CD + T123G                       |
| 1b    | Rational combination of beneficial diversity by overlap extension PCR | 7                         | No improved variants                                             | CD1.1 = CD + T123G                       |
| 2a    | Saturation mutagenesis at 10 positions                                | 970                       | N72P, A88G, N125T, L149V                                         | CD1.1 + L149V                            |
| 2b    | Rational combination of beneficial diversity by overlap extension PCR | 7                         | All combinations of variants showed some improvement in activity | CD1.2 = CD1.1 + N72P, A88G, N125T, L149V |
| 3a    | Saturation mutagenesis at 36 positions                                | 2,300                     | A53E, T125S, I147V, R152L                                        | CD1.2 + I147V                            |
| 3b    | Rational combination of beneficial diversity by overlap extension PCR | 11                        | All combinations of variants showed some improvement in activity | CD1.3 = CD1.2 + A53E, T125S, I147V       |



| NAME                            | SEQUENCE                               |
|---------------------------------|----------------------------------------|
| FLANKING PRIMERS                |                                        |
| CD_NDEI_F                       | CATGCATGCATATGCACCCGCGTTTT             |
| CD_XHOI_R                       | CATGCATGCTCGAGGGCTAACAGCA              |
| ROUND 1A SATURATION MUTAGENESIS |                                        |
| CD_RD1_A61NNK_F                 | CTGCTTCCACTTGCTNNGCTTGTGCACGTACC       |
| CD_RD1_A61NNK_R                 | AGCAAGTGAAGCAGTG                       |
| CD_RD1_C63NNK_F                 | CCACTTGCTGCAGCTNNGCAGTACCCCTTTG        |
| CD_RD1_C63NNK_R                 | AGCTGCAGCAAGTGGAA                      |
| CD_RD1_T66NNK_F                 | GCAGCTTGTGCAGTNNKCCTTTGTCCAACCTTCAATGT |
| CD_RD1_T66NNK_R                 | ACGTGCACAAGCTGCA                       |
| CD_RD1_L68NNK_F                 | TGTGCACGTACCCCTNNKTCCAACCTTCAATGTCCGGT |
| CD_RD1_L68NNK_R                 | AGGGGTACGTGCACAAG                      |
| CD_RD1_S69NNK_F                 | GCACGTACCCCTTTGNNKAACTTCAATGTCCGGTGCG  |
| CD_RD1_S69NNK_R                 | CAAAGGGGTACGTGCACA                     |
| CD_RD1_N70NNK_F                 | CGTACCCCTTTGTCCNNKTTCAATGTCCGGTGCGA    |
| CD_RD1_N70NNK_R                 | GGACAAAGGGGTACGTG                      |
| CD_RD1_F71NNK_F                 | ACCCCTTTGTCCAACNNKAAATGTCCGGTGCGATTGC  |
| CD_RD1_F71NNK_R                 | GTTGGACAAAGGGGTACG                     |
| CD_RD1_N72NNK_F                 | CCTTTGTCCAACCTCANNKGTCCGGTGCGATTGCG    |
| CD_RD1_N72NNK_R                 | GAAGTTGGACAAAGGGGT                     |
| CD_RD1_V73NNK_F                 | TTGTCCAACCTTCAATNNKGGTGCGATTGCGCG      |
| CD_RD1_V73NNK_R                 | ATTGAAGTTGGACAAAGGG                    |
| CD_RD1_G74NNK_F                 | TCCAACCTTCAATGTCNNKGCATTGCGCGTGG       |
| CD_RD1_G74NNK_R                 | GACATTGAAGTTGGACAAAGG                  |
| CD_RD1_A75NNK_F                 | AACTTCAATGTCCGGTNNKATTGCGCGTGGTGTA     |
| CD_RD1_A75NNK_R                 | ACCGACATTGAAGTTGGA                     |
| CD_RD1_A88NNK_F                 | ACCTGGTATTTCCGGGNNKAACATGGAGTTTATCGGGG |
| CD_RD1_A88NNK_R                 | CCCGAAATACCAGTTCC                      |
| CD_RD1_N89NNK_F                 | TGGTATTTCCGGGCANNKATGGAGTTTATCGGGGC    |
| CD_RD1_N89NNK_R                 | TGCCCCGAAATACCAGG                      |
| CD_RD1_M90NNK_F                 | TATTTCCGGGGCAAACNNKAGTTTATCGGGGCGACT   |
| CD_RD1_M90NNK_R                 | GTTTGCCCCGAAATACCA                     |
| CD_RD1_E91NNK_F                 | TTCCGGGGCAAACATGNNKTTTATCGGGGCGACTATG  |
| CD_RD1_E91NNK_R                 | CATGTTTGCCCCGAAATA                     |
| CD_RD1_F92NNK_F                 | GGGGCAAACATGGAGNNKATCGGGGCGACTATG      |
| CD_RD1_F92NNK_R                 | CTCCATGTTTGCCCCGA                      |
| CD_RD1_Q98NNK_F                 | ATCGGGGCGACTATGNNKCAAACCGTTCATGCTGAA   |
| CD_RD1_Q98NNK_R                 | CATAGTCGCCCCGATAAACTC                  |
| CD_RD1_Q99NNK_F                 | GGGGCGACTATGCAGNNKACCGTTCATGCTGAACA    |
| CD_RD1_Q99NNK_R                 | CTGCATAGTCGCCCC                        |
| CD_RD1_T100NNK_F                | GCGACTATGCAGCAANNKGTTCATGCTGAACAGAGC   |
| CD_RD1_T100NNK_R                | TTGCTGCATAGTCGCC                       |

CD\_RD1\_V101NNK\_F ACTATGCAGCAAACCNKCATGCTGAACAGAGCGC  
CD\_RD1\_V101NNK\_R GGTGGCTGCATAGTCGC  
CD\_RD1\_H102NNK\_F ATGCAGCAAACCGTTNNKGCTGAACAGAGCGCG  
CD\_RD1\_H102NNK\_R AACGGTTTGCTGCATAGT  
CD\_RD1\_A103NNK\_F CAGCAAACCGTTCATNNKGAACAGAGCGCGATC  
CD\_RD1\_A103NNK\_R ATGAACGGTTTGCTGCAT  
CD\_RD1\_Q105NNK\_F ACCGTTTCATGCTGAANNKAGCGCGATCAGCCAT  
CD\_RD1\_Q105NNK\_R TTCAGCATGAACGGTTTG  
CD\_RD1\_S106NNK\_F GTTCATGCTGAACAGNNKGCATCAGCCATGCG  
CD\_RD1\_S106NNK\_R CTGTTTCAGCATGAACGGT  
CD\_RD1\_A107NNK\_F CATGCTGAACAGAGCNNKATCAGCCATGCGTGG  
CD\_RD1\_A107NNK\_R GCTCTGTTTCAGCATGAAC  
CD\_RD1\_I122NNK\_F AAGGCATTAGCCGCGNNKACCGTGAATTACACGCC  
CD\_RD1\_I122NNK\_R CGCGGCTAATGCCTTC  
CD\_RD1\_T123NNK\_F GCATTAGCCGCGATCNNKGTGAATTACACGCCATGC  
CD\_RD1\_T123NNK\_R GATCGCGCTAATGCCT  
CD\_RD1\_V124NNK\_F TTAGCCGCGATCACCNKAATTACACGCCATGCG  
CD\_RD1\_V124NNK\_R GGTGATCGCGGCTAATG  
CD\_RD1\_N125NNK\_F GCCGCGATCACCGTGNNKTACACGCCATGCGGA  
CD\_RD1\_N125NNK\_R CACGGTGATCGCGG  
CD\_RD1\_Y126NNK\_F GCGATCACCGTGAATNNKACGCCATGCGGACA  
CD\_RD1\_Y126NNK\_R ATTCACGGTGATCGCGG  
CD\_RD1\_T127NNK\_F ATCACCGTGAATTACNNKCCATGCGGACACTGT  
CD\_RD1\_T127NNK\_R GTAATTCACGGTGATCGC  
CD\_RD1\_P128NNK\_F ACCGTGAATTACACGNNKTGCGGACACTGTCCG  
CD\_RD1\_P128NNK\_R CGTGTAATTCACGGTGATC  
CD\_RD1\_C129NNK\_F GTGAATTACACGCCANNKGGACACTGTCCGCCAG  
CD\_RD1\_C129NNK\_R TGGCGTGAATTCACGGT  
CD\_RD1\_G130NNK\_F AATTACACGCCATGCNNKCACTGTCCGAGTTTATG  
CD\_RD1\_G130NNK\_R GCATGGCGTGTAATTCAC  
CD\_RD1\_H131NNK\_F TACACGCCATGCGGANNKTGTCCGAGTTTATGAATG  
CD\_RD1\_H131NNK\_R TCCGCATGGCGTGTAATT  
CD\_RD1\_C132NNK\_F ACGCCATGCGGACACNNKCGCCAGTTTATGAATGAGTT  
CD\_RD1\_C132NNK\_R GTGTCCGCATGGCG  
CD\_RD1\_R133NNK\_F CCATGCGGACACTGTNNKCACTTTATGAATGAGTTGA  
CD\_RD1\_R133NNK\_R ACAGTGTCGCATGG  
CD\_RD1\_Q134NNK\_F TGCGGACACTGTGCNNKTTTATGAATGAGTTGA  
CD\_RD1\_Q134NNK\_R GCGACAGTGTCGC  
CD\_RD1\_M136NNK\_F CACTGTCCGAGTTTNNKAATGAGTTGA  
CD\_RD1\_M136NNK\_R AAAGTGGCGACAGTGTC  
CD\_RD1\_H148NNK\_F TTGGATCTTCGTATCNNKCTGCCGGGACGTGAA  
CD\_RD1\_H148NNK\_R GATACGAAGATCCAAGCCT  
CD\_RD1\_L149NNK\_F GATCTTCGTATCCACNNKCCGGGACGTGAAGC  
CD\_RD1\_L149NNK\_R GTGGATACGAAGATCCAAGC

CD\_RD1\_P150NNK\_F CTTCGTATCCACCTGNNKGGACGTGAAGCCCAT  
CD\_RD1\_P150NNK\_R CAGGTGGATACGAAGATCC

ROUND 1B RECOMBINATION

---

CD\_RD1\_A88W\_F ACCTGGTATTTTCGGGTGGAACATGGAGTTTATCGGGG  
CD\_RD1\_A88\_R CCCGAAATACCAGGTTCC  
CD\_RD1\_T123G\_N125S\_F GCATTAGCCGCGATCGGGGTGTCGTACACGCCATGCGGA  
CD\_RD1\_T123\_R GATCGCGCTAATGCCT  
CD\_RD1\_T123G\_N125G\_F GCATTAGCCGCGATCGGGGTGGGGTACACGCCATGCGGA

ROUND 2A SATURATION MUTAGENESIS

---

CD\_RD2\_N125NNK\_F GCCGCGATCGGGGTGNNKTACACGCCATGCGGA  
CD\_RD2\_N125NNK\_R CACCCCGATCGCGG  
CD\_RD2\_I76NNK\_F TTCAATGTCGGTGCNNKGC GCGTGGTGTAA G  
CD\_RD2\_I76NNK\_R CGCACCGACATTGAA  
CD\_RD2\_V124NNK\_F TTAGCCGCGATCGGGNNKAATTACACGCCATGCG  
CD\_RD2\_V124NNK\_R CCCGATCGCGGCTAA  
CD\_RD2\_I122NNK\_F AAGGCATTAGCCGCGNNKGGGGTGAATTACACGC  
CD\_RD2\_I122NNK\_R CGCGGCTAATGCCTT

ROUND 2B RECOMBINATION

---

CD\_RD2\_A88G\_F ACCTGGTATTTTCGGGGGCAACATGGAGTTTATCGGGG  
CD\_RD2\_A88\_R CCCGAAATACCAGGTTCC  
CD\_RD2\_N72P\_F CCTTTGTCCAACCTTCCCTGTCGGTGCGATTGCG  
CD\_RD2\_N72\_R GAAGTTGGACAAAGGGGT  
CD\_RD2\_N125D\_F GCCGCGATCGGGGTGGATTACACGCCATGCGGA  
CD\_RD2\_N125\_R CACCCCGATCGCGGC  
CD\_RD2\_N125T\_F GCCGCGATCGGGGTGACGTACACGCCATGCGGA  
CD\_RD2\_L149V\_F GATCTTCGTATCCACGTGCCGGGACGTGAAGC  
CD\_RD2\_L149\_R GTGGATACGAAGATCCAAGC

ROUND 3A SATURATION MUTAGENESIS

---

CD\_RD3\_P72NDT\_F CCTTTGTCCAACCTTNCNDTGTTCGGTGCGATTGC  
CD\_RD3\_P72VHG\_F CCTTTGTCCAACCTTVCVHGGTTCGGTGCGATTGC  
CD\_RD3\_P72TGG\_F CCTTTGTCCAACCTTCTGGGTTCGGTGCGATTGC  
CD\_RD3\_P72\_R GAAGTTGGACAAAGGGG  
CD\_RD3\_G88NDT\_F ACCTGGTATTTTCGGGNDTAACATGGAGTTTATCGGG  
CD\_RD3\_G88VHG\_F ACCTGGTATTTTCGGGVHGAACATGGAGTTTATCGGG  
CD\_RD3\_G88TGG\_F ACCTGGTATTTTCGGGTGGAACATGGAGTTTATCGGG  
CD\_RD3\_G88\_R CCCGAAATACCAGGTT  
CD\_RD3\_T125NDT\_F GCCGCGATCGGGGTGNDTTACACGCCATGCGGA  
CD\_RD3\_T125VHG\_F GCCGCGATCGGGGTGVHGTACACGCCATGCGGA  
CD\_RD3\_T125TGG\_F GCCGCGATCGGGGTGTGGTACACGCCATGCGGA  
CD\_RD3\_T125\_R CACCCCGATCGCGG  
CD\_RD3\_D50NNK\_F ACGGGACTGGACGAANNKGCTCTTGCGTTTGAC  
CD\_RD3\_D50\_R TTCGTCCAGTCCCGT  
CD\_RD3\_A53NNK\_F GACGAAGATGCTCTTNNKTTTGCCTGCTTCCAC  
CD\_RD3\_A53\_R AAGAGCATCTTCGTCCA

CD\_RD3\_F54NNK\_F GAAGATGCTCTTGCGNNKGCAGCTGCTTCCACTT  
CD\_RD3\_F54\_R CGCAAGAGCATCTTCG  
CD\_RD3\_L57NNK\_F CTTGCGTTTTGCACTGNNKCCACTTGCTGCAGCT  
CD\_RD3\_L57\_R CAGTGCAAACGCAAGA  
CD\_RD3\_A60NNK\_F GCACTGCTTCCACTTNNKGCAGCTTGTGCACG  
CD\_RD3\_A60\_R AAGTGAAGCAGTGCA  
CD\_RD3\_A61NNK\_F CTGCTTCCACTTGCTNNKGCTTGTGCACGTACC  
CD\_RD3\_A61\_R AGCAAGTGAAGCAGT  
CD\_RD3\_C63NNK\_F CCACTTGCTGCAGCTNNKGCAGTACCCCTTTG  
CD\_RD3\_C63\_R AGCTGCAGCAAGTGG  
CD\_RD3\_A64NNK\_F CTTGCTGCAGCTTGTNNKCGTACCCCTTTGTCC  
CD\_RD3\_A64\_R ACAAGCTGCAGCAAG  
CD\_RD3\_T66NNK\_F GCAGCTTGTGCACGTNNKCCTTTGTCCAACCTTCCC  
CD\_RD3\_T66\_R ACGTGCACAAGCTG  
CD\_RD3\_N70NNK\_F CGTACCCCTTTGTCCNNKTTCCCTGTCCGGTGC  
CD\_RD3\_N70\_R GGACAAAGGGGTACGT  
CD\_RD3\_F71NNK\_F ACCCCTTTGTCCAACNNKCCTGTCCGGTGCATT  
CD\_RD3\_F71\_R GTTGGACAAAGGGGTAC  
CD\_RD3\_V73NNK\_F TTGTCCAACCTTCCCTNNKGGTGCATTGCGC  
CD\_RD3\_V73\_R AGGGAAGTTGGACAAAGG  
CD\_RD3\_G74NNK\_F TCCAACCTTCCCTGTCNNKGCATTGCGCGTG  
CD\_RD3\_G74\_R GACAGGGAAGTTGGACA  
CD\_RD3\_I76NNK\_F TTCCCTGTCCGGTGCNNKGCCTGGTGTAAAG  
CD\_RD3\_I76\_R CGCACCGACAGGGA  
CD\_RD3\_R78NNK\_F GTCGGTGCATTGCGNNKGGTGTAAAGCGGAACC  
CD\_RD3\_R78\_R CGCAATCGCACCGA  
CD\_RD3\_F86NNK\_F AGCGGAACCTGGTATNNKGGGGCAACATGGAG  
CD\_RD3\_F86\_R ATACCAGGTTCCGCTT  
CD\_RD3\_G87NNK\_F GGAACCTGGTATTTCCNNKGGCAACATGGAGTTTATCG  
CD\_RD3\_G87\_R GAAATACCAGGTTCCGCT  
CD\_RD3\_N89NNK\_F TGGTATTTCCGGGGCANNKATGGAGTTTATCGGGGC  
CD\_RD3\_N89\_R GCCCCCGAAATACCA  
CD\_RD3\_M90NNK\_F TATTTCCGGGGCAACNNKGAGTTTATCGGGGCGA  
CD\_RD3\_M90\_R GTTCCCCCGAAATAC  
CD\_RD3\_A103NNK\_F CAGCAAACCGTTTCATNNKGAACAGAGCGCGATC  
CD\_RD3\_A103\_R ATGAACGGTTTTGCTGC  
CD\_RD3\_S106NNK\_F GTTCATGCTGAACAGNNKGCATCAGCCATGC  
CD\_RD3\_S106\_R CTGTTCCAGCATGAACGG  
CD\_RD3\_A121NNK\_F GAGAAGGCATTAGCCNNKATCGGGGTGACGTAC  
CD\_RD3\_A121\_R GGCTAATGCCTTCTCC  
CD\_RD3\_I122NNK\_F AAGGCATTAGCCGCGNNKGGGGTGACGTACACG  
CD\_RD3\_I122\_R CGCGGCTAATGCCT  
CD\_RD3\_V124NNK\_F TTAGCCGCGATCGGGNNKACGTACACGCCATGC  
CD\_RD3\_V124\_R CCCGATCGCGGCTA

|                  |                                       |
|------------------|---------------------------------------|
| CD_RD3_Y126NNK_F | GCGATCGGGGTGACGNNKACGCCATGCGGAC       |
| CD_RD3_Y126_R    | CGTCACCCCGATCG                        |
| CD_RD3_T127NNK_F | ATCGGGGTGACGTACNNKCCATGCGGACACTGT     |
| CD_RD3_T127_R    | GTACGTCACCCCGAT                       |
| CD_RD3_I147NNK_F | GGCTTGGATCTTCGTNNKACGTGCCGGGA         |
| CD_RD3_I147_R    | ACGAAGATCCAAGCCT                      |
| CD_RD3_H148NNK_F | TTGGATCTTCGTATCNNKGTGCCGGGACGTG       |
| CD_RD3_H148_R    | GATACGAAGATCCAAGCCT                   |
| CD_RD3_P150NNK_F | CTTCGTATCCACGTGNNKGGACGTGAAGCCCAT     |
| CD_RD3_P150_R    | CACGTGGATACGAAGATCC                   |
| CD_RD3_G151NNK_F | CGTATCCACGTGCCGNNKCGTGAAGCCCATGCT     |
| CD_RD3_G151_R    | CGGCACGTGGATACG                       |
| CD_RD3_R152NNK_F | ATCCACGTGCCGGGANNKGAAGCCCATGCTTTACG   |
| CD_RD3_R152_R    | TCCCGGCACGTGGA                        |
| CD_RD3_E153NNK_F | CACGTGCCGGGACGTNNKGCCCATGCTTTACGTGACT |
| CD_RD3_E153_R    | ACGTCCCGGCACGT                        |
| CD_RD3_H155NNK_F | CCGGGACGTGAAGCCNNKGCTTTACGTGACTACTTGC |
| CD_RD3_H155_R    | GGCTTCACGTCCCG                        |
| CD_RD3_Y160NNK_F | CATGCTTTACGTGACNNKTTGCCTGATGCCTTC     |
| CD_RD3_Y160_R    | GTCACGTAAAGCATGGG                     |
| CD_RD3_N248NNK_F | GCGCTGATTCTTTTANNKTTGAAGGGCTATGACTACC |
| CD_RD3_N248_R    | TAAAGAATCAGCGCTCCT                    |
| CD_RD3_L249NNK_F | CTGATTCTTTTAAATNNKAAGGGCTATGACTACCC   |
| CD_RD3_L249_R    | ATTTAAAGAATCAGCGCTCC                  |

ROUND 3B RECOMBINATION

---

|                        |                                     |
|------------------------|-------------------------------------|
| CD_RD3_T125S_F         | GCCGCGATCGGGGTGAGTTACACGCCATGCGGA   |
| CD_RD3_T125_R          | CACCCCGATCGCGGC                     |
| CD_RD3_A53E_F          | GACGAAGATGCTCTTGAGTTTGCACTGCTTCCAC  |
| CD_RD3_A53_R           | AAGAGCATCTTCGTCCA                   |
| CD_RD3_I147V_F         | GGCTTGGATCTTCGTGTTACGTGCCGGGA       |
| CD_RD3_I147_R          | ACGAAGATCCAAGCCT                    |
| CD_RD3_R152L_F (I147)  | ATCCACGTGCCGGGACTGGAAGCCCATGCTTTACG |
| CD_RD3_R152L_F (I147V) | GTTACGTGCCGGGACTGGAAGCCCATGCTTTACG  |
| CD_RD3_R152_R (I147)   | TCCCGGCACGTGGAT                     |
| CD_RD3_R152_R (I147V)  | TCCCGGCACGTGAAC                     |

---

CD - EC 3.5.4.5, UniProt accession: P0ABF6, NCBI protein accession code: WP\_000553555.1

ATGCACCCGCGTTTTTCAGACGGCGTTCGCCAGTTAGCTGACAATCTGCAGAGTGCCTTGGAGCCTATCTTGGCAGAT  
AAGTATTTTCCGGCCCTGCTGACCGGGGAGCAAGTTTCTCCTTGAAAAGCGCTACGGGACTGGACGAAGATGCTCTT  
GCGTTTGCAGTCTTCCACTTGTGTCAGCTTGTGCACGTACCCCTTTGTCCAACCTCAATGTCGGTGCGATTGCGCGT  
GGTGTAAAGCGGAACCTGGTATTTCCGGGGCAAACATGGAGTTTATCGGGGCGACTATGCAGCAAACCGTTCATGCTGAA  
CAGAGCGCGATCAGCCATGCGTGGCTGAGCGGGGAGAAGGCATTAGCCGCGATCACCCTGAATTACACGCCATGCGGA  
CACTGTCGCCAGTTTATGAATGAGTTGAACTCAGGCTTGGATCTTCGTATCCACCTGCCGGGACGTGAAGCCCATGCT  
TTACGTGACTACTTGCCTGATGCCTTCGGTCCCAAGGACTTAGAAAATCAAGACCCTTCTTATGGACGAACAAGACCACG  
GATATGCGCTTACTGGAGATGCACTGTCCCAGGCTGCAATCGCTGCGGCCAACCGTAGCCACATGCCCTACTCCAAGA  
GTCCGAGCGGTGTGCGACTGGAGTGTAAGATGGACGTATTTTACGCGGCTCATAACGCGGAGAATGCGGCTTTCAATC  
CCACTCTTCCCCCGTTACAAGGAGCGCTGATTCTTTTAAATTTGAAGGGCTATGACTACCCAGACATTCAACGTGCAGT  
GCTTGCCGAGAAGGCGGACGCACCATTGATCCAATGGGATGCTACCAGCGCAACTCTGAAAAGCTTTAGGGTGTACAG  
CATCGATCGCGTGCTGTTAGCCCTCGAGCACCACCACCACCAC

MHPRFQTAFAQLADNLOSALPILADKYFPALLTGEQVSSLKSATGLDEDALAFALLPLAAACARTPLSNFNVGAIARGVSGTWY  
FGANMEFIGATMQQTVHAEQSAISHAWLSGEKALAAITVNYTPCGHCRQFMNELNSGLDLRIHLPGREAHALRDYLPDAFGPK  
DLEIKTLLMDEQDHGYALTGDALSQAIAAANRSHMPYSKSPSGVALECKDGRIFSGSYAENAAFNPPLPLOGALILLNLKGYD  
YPDIOQRAVLAEKADAPLIQWDATSATLKALGCHSIDRVLLALEHHHHHH

DNA and protein sequence of CD1.3

Mutations from wild-type CD: A53E N72P A88G T123G T125S I147V L149V

ATGCACCCGCGTTTTTCAGACGGCGTTCGCCAGTTAGCTGACAATCTGCAGAGTGCCTTGGAGCCTATCTTGGCAGAT  
AAGTATTTTCCGGCCCTGCTGACCGGGGAGCAAGTTTCTCCTTGAAAAGCGCTACGGGACTGGACGAAGATGCTCTT  
GAGTTTGCAGTCTTCCACTTGTGTCAGCTTGTGCACGTACCCCTTTGTCCAACCTTCCCTGTCGGTGCGATTGCGCGT  
GGTGTAAAGCGGAACCTGGTATTTCCGGGGCAAACATGGAGTTTATCGGGGCGACTATGCAGCAAACCGTTCATGCTGAA  
CAGAGCGCGATCAGCCATGCGTGGCTGAGCGGGGAGAAGGCATTAGCCGCGATCGGGGTGAGTTACACGCCATGCGG  
ACACTGTCGCCAGTTTATGAATGAGTTGAACTCAGGCTTGGATCTTCGTGTTTACAGTGCCGGGACGTGAAGCCCATGC  
TTTACGTGACTACTTGCCTGATGCCTTCGGTCCCAAGGACTTAGAAAATCAAGACCCTTCTTATGGACGAACAAGACCAC  
GGATATGCGCTTACTGGAGATGCACTGTCCCAGGCTGCAATCGCTGCGGCCAACCGTAGCCACATGCCCTACTCCAAG  
AGTCCGAGCGGTGTGCGACTGGAGTGTAAGATGGACGTATTTTACGCGGCTCATAACGCGGAGAATGCGGCTTTCAAT  
CCCCTCTTCCCCCGTTACAAGGAGCGCTGATTCTTTTAAATTTGAAGGGCTATGACTACCCAGACATTCAACGTGCAG  
TGCTTGCCGAGAAGGCGGACGCACCATTGATCCAATGGGATGCTACCAGCGCAACTCTGAAAAGCTTTAGGGTGTACAG  
GCATCGATCGCGTGCTGTTAGCCCTCGAGCACCACCACCACCAC

MHPRFQTAFAQLADNLOSALPILADKYFPALLTGEQVSSLKSATGLDEDALEFALLPLAAACARTPLSNFPVGAIRGVSGTWYF  
GGNMEFIGATMQQTVHAEQSAISHAWLSGEKALAAIGVSYTPCGHCRQFMNELNSGLDLRVHVPGREAHALRDYLPDAFGPK  
DLEIKTLLMDEQDHGYALTGDALSQAIAAANRSHMPYSKSPSGVALECKDGRIFSGSYAENAAFNPPLPLOGALILLNLKGYD  
YPDIOQRAVLAEKADAPLIQWDATSATLKALGCHSIDRVLLALEHHHHHH
